# Supplementary material
Source: MDPI journal article supplement (https://www.mdpi.com/2571-6980/1/2/25)
Supplement: s1 [file s1]

## Supplementary Materials

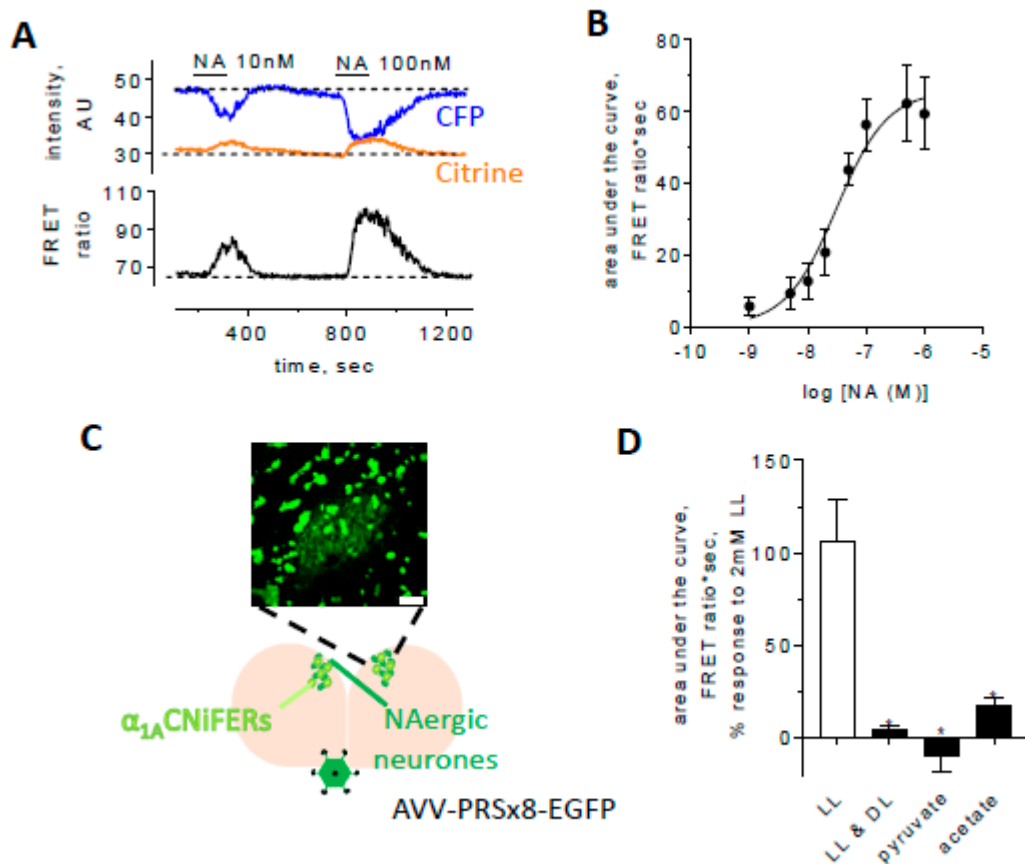

**Figure S1. L-lactate evokes noradrenaline release from organotypic brain slices cultures as confirmed by using  $\alpha_1$  CNiFER cells.** (A) Representative traces for responses of  $\alpha_1$  CNiFER cells evoked by 10nM and 100nM noradrenaline (NA) in orange (F1) and cyan (F2) fluorescence (top) and their FRET ratio (F1/F2\*100; below). Area under the curve of the FRET ratio corresponds to the amount of NA released. (B) Concentration-response curve for  $\alpha_1$  CNiFER cells in response to NA,  $EC_{50} = 31 \pm 1.75$  nM. Data are represented as mean  $\pm$  SEM ( $n = 4$  for each data point). (C) Schematic of the recording set up: organotypic brain slice cultures containing locus coeruleus were transduced with AVV-PRsX8-EGFP to visualise noradrenergic neurones.  $4 \times 10^5$  of  $\alpha_1$  CNiFER cells were placed on the cell culture insert 24hrs before imaging. Response to L-lactate (LL), its analogues and other metabolites was calculated by measuring the area under the curve of the FRET ratio for  $\alpha_1$  CNiFERS plated onto locus coeruleus (LC) area. Inset—confocal stack image, scale bar 100 $\mu$ m. (D) 2mM LL evokes NA release from organotypic brain slices which is abolished by pre-incubation with 200 $\mu$ M DL. Neither 2mM pyruvate nor 2mM acetate were able to stimulate NA release. \* $p < 0.05$  vs. 2mM LL, one-way ANOVA with Dunnett's multiple comparison as a post-hoc test. Data are represented as mean  $\pm$  SEM.

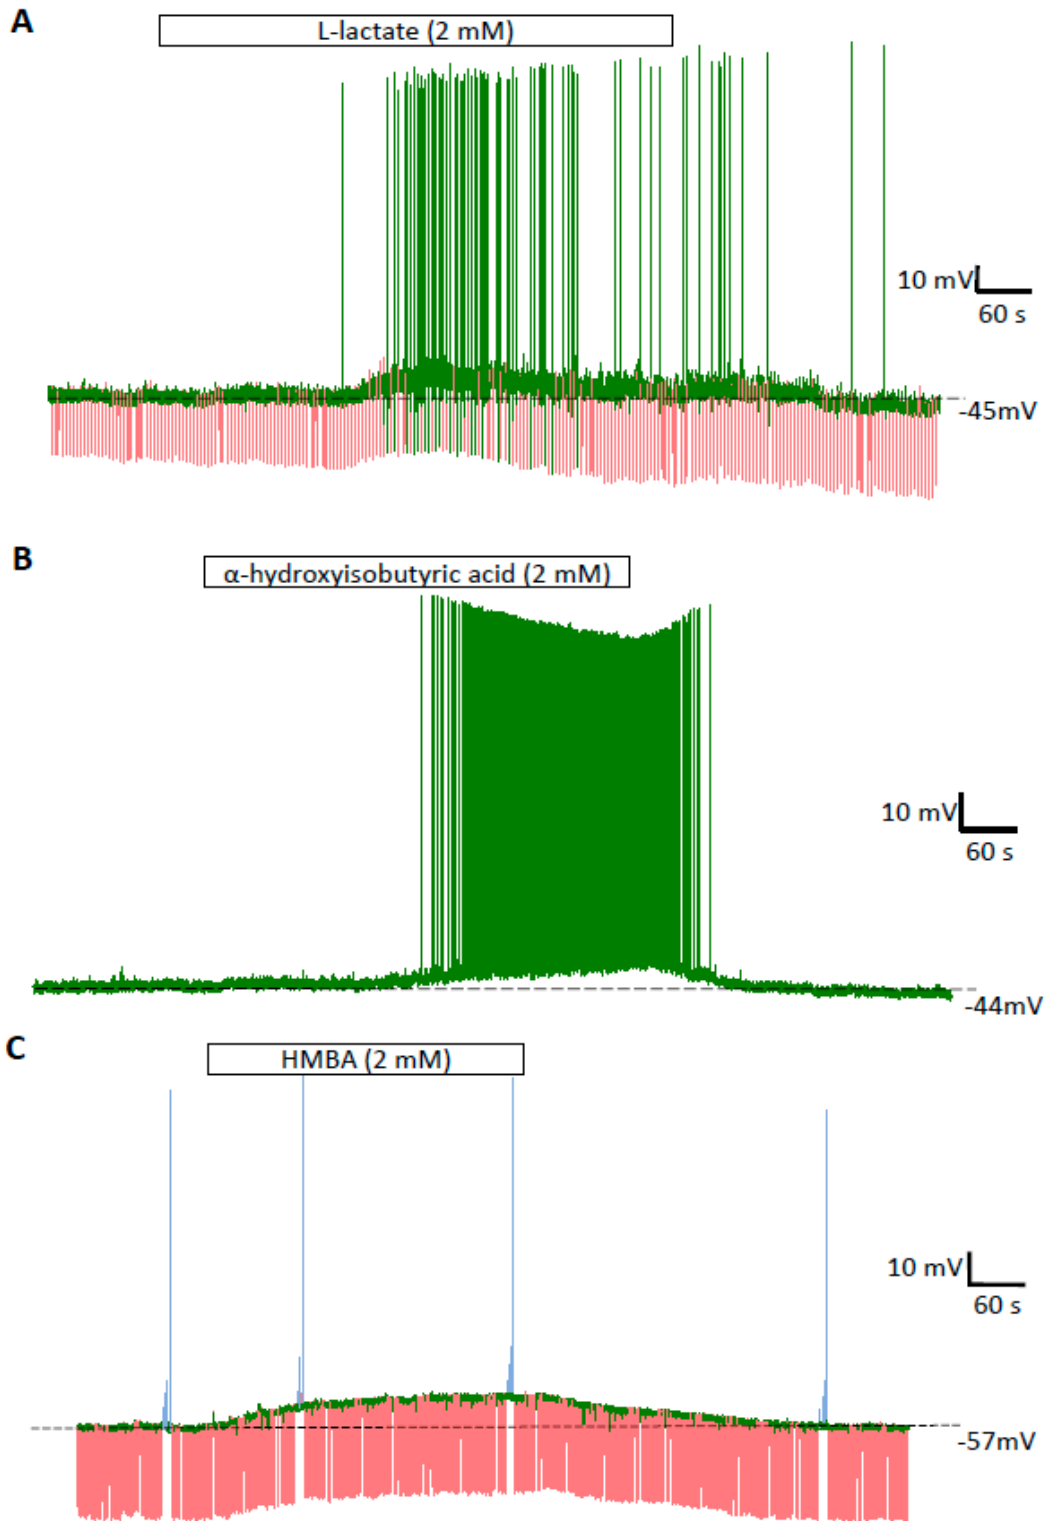

**Figure S2. L-lactate and analogues excite noradrenergic LC neurones.** Representative current clamp recordings from noradrenergic neurones of locus coeruleus in organotypic brain slice cultures show transient depolarisations in response to L-lactate (LL; **A**), or its analogues  $\alpha$ -hydroxyisobutyric acid (**B**) and 2-hydroxy-3-methyl-butyric acid (HMBA; **C**). To visualize noradrenergic neurones the cultures were transduced with an adenoviral vector (AVV-PRsX8-eGFP) which drives expression of green fluorescent protein specifically in noradrenergic

neurons. Dotted lines indicate membrane potential of the neurone. Red downward voltage deviations mark responses to application of  $-0.06$  nA square current pulses for monitoring series and input resistance. Blue upward voltage deviations show response to application of positive square current pulses (increments of  $0.01$  nA) to determine action potential threshold in silent neurones. No adjustment for junctional potential has been made.
